# Supplementary material for: Potential Immunogenic Activity of Computationally Designed mRNA- and Peptide-Based Prophylactic Vaccines against MERS, SARS-CoV, and SARS-CoV-2: A Reverse Vaccinology Approach
Source: MDPI journal article supplement (doi:10.3390/molecules27072375), 2022-04-06
Supplement: s1 [file s1]

## Supplementary Information

# Potential immunogenic activity of computationally designed Spike-RBD epitopes based prophylactic vaccine against MERS, SARS-CoV and SARS-CoV-2, A reverse vaccinology approach

Taimoor Khan<sup>1</sup>, Abbas Khan<sup>1</sup>, Jawad Khaliq Ansari<sup>2</sup>, Muzammil Hasan Najmi<sup>2</sup>, Dong-Qing Wei<sup>1,3,4</sup>, Khalid Muhammad<sup>5\*</sup>, Yasir Waheed<sup>2\*</sup>

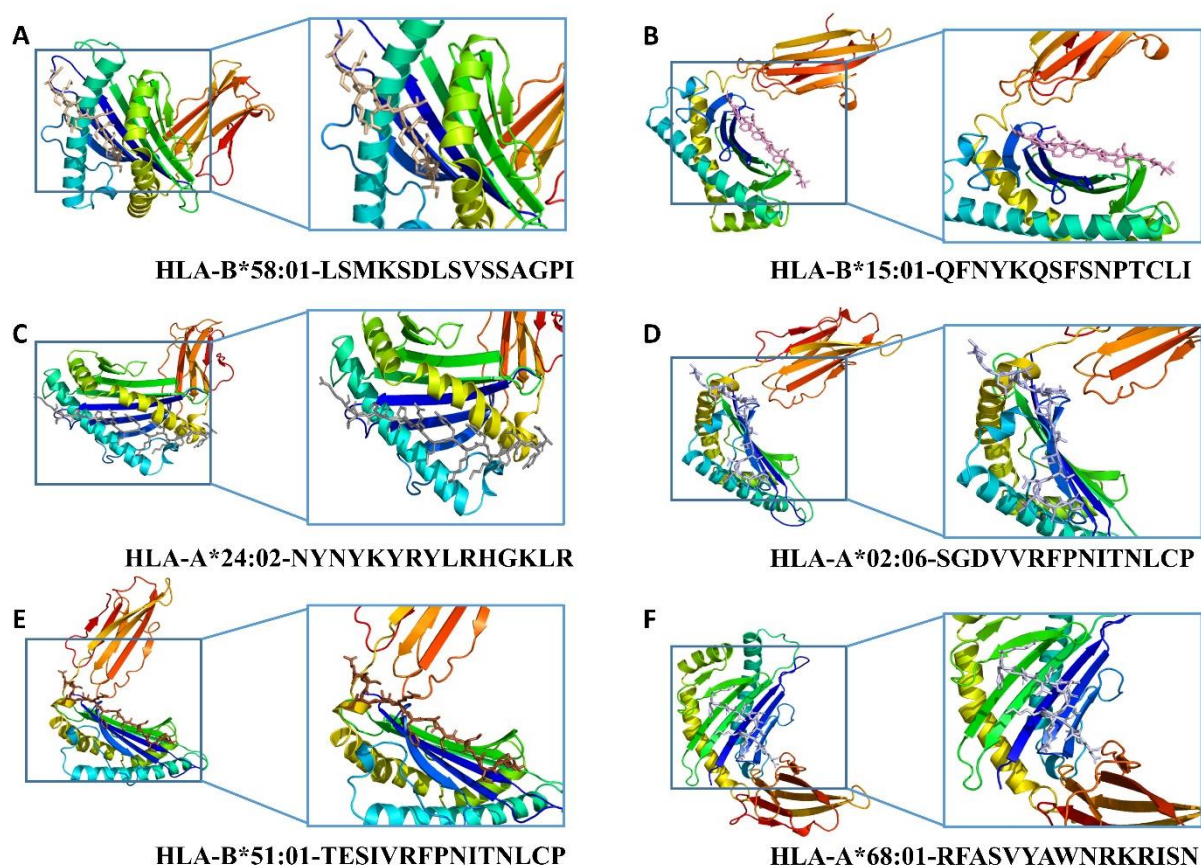

**Figure S1.** Showing docking complexes of HTL epitopes for each CoV specie with respective HLAs.

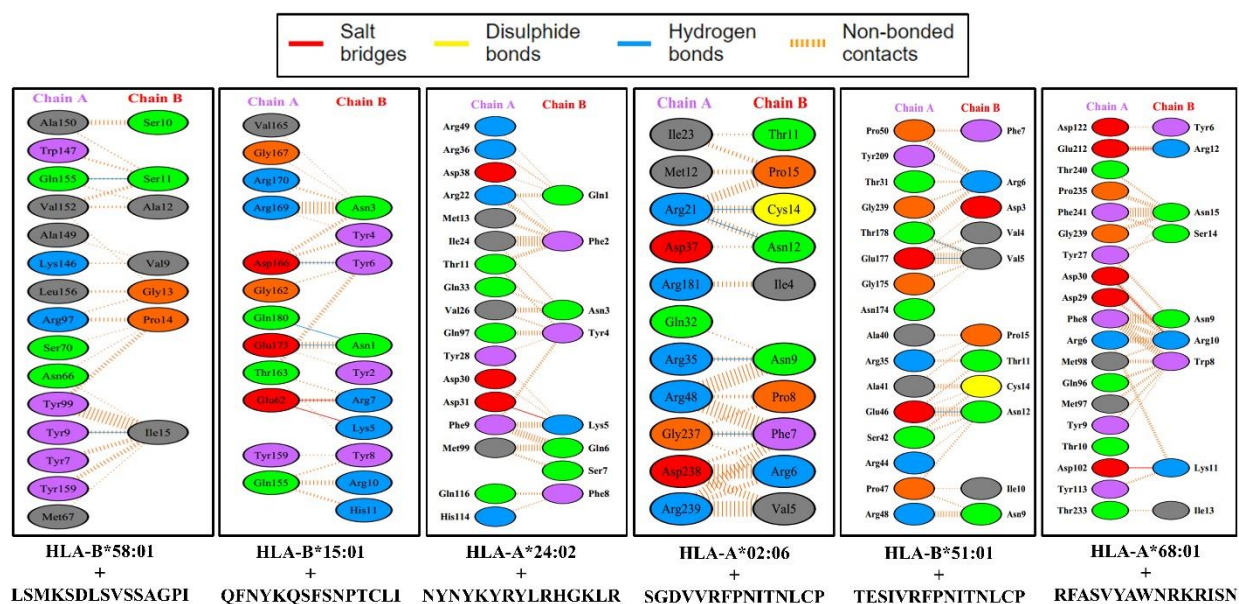

Figure S2. Showing interaction patterns of individual HTL epitopes with respective HLAs.

Table S1. Showing details of binding scores and identified interaction patterns between the different immune epitopes and respective HLAs.

| Epitope + HLA complex          | Epitope position in the RBD domain | hCOV specie | Docking Score | Binding free energy | Number of Hydrogen Bonds | Number of Salt Bridges | Number of non-bonded contacts |
|--------------------------------|------------------------------------|-------------|---------------|---------------------|--------------------------|------------------------|-------------------------------|
| MTEQLQMGEF + HLA-B*57:01       | 183-191                            | MERS-CoV    | -2244.26      | -27.86 kcal/mol     | 5                        | -                      | 92                            |
| NATKFPSVY + HLA-B*35:01        | 25-33                              | SARS-CoV    | -2426.57      | -20.65 kcal/mol     | 3                        | -                      | 140                           |
| VGGNYNYLY + HLA-A*01:01        | 127-135                            | SARS-CoV-2  | -2945.07      | -21.87 kcal/mol     | 5                        | -                      | 142                           |
| LSMKSDLSVSSAGPI + HLA-B*58:01  | 70-84                              | MERS-CoV    | -2334.26      | -37.1 kcal/mol      | 2                        | -                      | 105                           |
| QFNYKQSFNSPTCLI + HLA-B*15:01  | 86-100                             | MERS-CoV    | -2785.36      | -31.49 kcal/mol     | 3                        | 2                      | 132                           |
| NYNYKYRYLRHGKLR + HLA-A*24:02  | 130-144                            | SARS-CoV    | -3279.04      | -33.44 kcal/mol     | -                        | 1                      | 141                           |
| SGDVVRFPNITNLCP + HLA-A*02:06  | 5-19                               | SARS-CoV    | -2602.58      | -35.7 kcal/mol      | 4                        | -                      | 141                           |
| TESIVRFPNITNLCP + HLA-B*51:01  | 5-19                               | SARS-CoV-2  | -2728.46      | -29.69 kcal/mol     | 3                        | -                      | 118                           |
| RFASVYAWNRRKRISN + HLA-A*68:01 | 28-42                              | SARS-CoV-2  | -3669.67      | -46.27 kcal/mol     | -                        | 3                      | 189                           |

**Table S2.** Showing details free energy calculations for the different CTL and HTL epitopes and respective HLAs.

| Complex name                  | Epitope position in the RBD Domain | VDW    | ELE     | GB     | SA     | TOTAL  |
|-------------------------------|------------------------------------|--------|---------|--------|--------|--------|
| MTEQLQMGF + HLA-B*57:01       | 183-191                            | -48.52 | -59.59  | 87.51  | -7.26  | -27.86 |
| NATKFPSVY + HLA-B*35:01       | 25-33                              | -62.66 | -255.21 | 305.77 | -8.55  | -20.65 |
| VGGNYNYLY + HLA-A*01:01       | 127-135                            | -52.34 | -12.09  | 49.95  | -7.39  | -21.87 |
| LSMKSDLSVSSAGPI + HLA-B*58:01 | 70-84                              | -40.5  | -36.04  | 46.18  | -6.75  | -37.1  |
| QFNYKQSFSNPTCLI + HLA-B*15:01 | 86-100                             | -60.45 | -161.38 | 198.28 | -7.94  | -31.49 |
| NYNYKYRYLRHGKLR + HLA-A*24:02 | 130-144                            | -65.9  | -723.97 | 765.14 | -8.72  | -33.44 |
| SGDVVRFPNITNLCP + HLA-A*02:06 | 5-19                               | -60.84 | -134.77 | 168.83 | -8.92  | -35.7  |
| TESIVRFPNITNLCP + HLA-B*51:01 | 5-19                               | -54.92 | -127.72 | 160.74 | -7.79  | -29.69 |
| RFASVYAWNRKRISN + HLA-A*68:01 | 28-42                              | -74.1  | -602.08 | 640.31 | -10.41 | -46.27 |

**Table S3.** Showing physiochemical properties including of the proposed MEVC.

| Complex name                  | Epitope position in the RBD Domain | VDW    | ELE     | GB     | SA     | TOTAL  |
|-------------------------------|------------------------------------|--------|---------|--------|--------|--------|
| MTEQLQMGF + HLA-B*57:01       | 183-191                            | -48.52 | -59.59  | 87.51  | -7.26  | -27.86 |
| NATKFPSVY + HLA-B*35:01       | 25-33                              | -62.66 | -255.21 | 305.77 | -8.55  | -20.65 |
| VGGNYNYLY + HLA-A*01:01       | 127-135                            | -52.34 | -12.09  | 49.95  | -7.39  | -21.87 |
| LSMKSDLSVSSAGPI + HLA-B*58:01 | 70-84                              | -40.5  | -36.04  | 46.18  | -6.75  | -37.1  |
| QFNYKQSFSNPTCLI + HLA-B*15:01 | 86-100                             | -60.45 | -161.38 | 198.28 | -7.94  | -31.49 |
| NYNYKYRYLRHGKLR + HLA-A*24:02 | 130-144                            | -65.9  | -723.97 | 765.14 | -8.72  | -33.44 |
| SGDVVRFPNITNLCP + HLA-A*02:06 | 5-19                               | -60.84 | -134.77 | 168.83 | -8.92  | -35.7  |
| TESIVRFPNITNLCP + HLA-B*51:01 | 5-19                               | -54.92 | -127.72 | 160.74 | -7.79  | -29.69 |
| RFASVYAWNRKRISN + HLA-A*68:01 | 28-42                              | -74.1  | -602.08 | 640.31 | -10.41 | -46.27 |
